# Supplementary material for: Measuring spirometry in a lung cancer screening cohort highlights possible underdiagnosis and misdiagnosis of COPD
Source: PubMed Central journal article supplement — ERJ Open Res. 2023 Aug 21;9(4):00203-2023. doi: 10.1183/23120541.00203-2023 (PMC10440649; doi:10.1183/23120541.00203-2023), 2023-08-21
Supplement: 00203-2023.SUPPLEMENT.pdf [file 00203-2023.SUPPLEMENT.pdf]

Table E1- Demographics of individuals categorised according to General Practice COPD diagnostic code, airflow obstruction, and the presence of COPD symptoms. GP, General Practitioner. COPD, Chronic Obstructive Pulmonary Disease. AO, Airflow Obstruction. SD, Standard Deviation. BMI, Body Mass Index. IQR, Interquartile Range. CSE, Certificate of Secondary Education.

|                                                        | Group 1<br>GP COPD code,<br>AO | Group 2<br>No GP COPD code,<br>AO, COPD symptoms | Group 3<br>No GP COPD code,<br>AO, Asymptomatic | Group 4<br>GP COPD code,<br>No AO | Group 5<br>No GP COPD code,<br>No AO |
|--------------------------------------------------------|--------------------------------|--------------------------------------------------|-------------------------------------------------|-----------------------------------|--------------------------------------|
| Number of participants, % of overall spirometry cohort | 676 17%                        | 655 17%                                          | 305 8%                                          | 160 4%                            | 2033 52%                             |
| Age, mean, SD                                          | 69.1 6.5                       | 68.3 7.1                                         | 69.6 6.5                                        | 68.6 7.1                          | 67.5 7.1                             |
| Male, n, %                                             | 334 49.4%                      | 388 59.2%                                        | 194 63.6%                                       | 78 48.8%                          | 1108 54.5%                           |
| <b>Ethnicity, n, %</b>                                 |                                |                                                  |                                                 |                                   |                                      |
| Asian                                                  | 12 1.8%                        | 2 0.3%                                           | 1 0.3%                                          | 5 3.1%                            | 30 1.5%                              |
| Black                                                  | 2 0.3%                         | 4 0.6%                                           | 4 1.3%                                          | 0 0.0%                            | 22 1.1%                              |
| Other                                                  | 6 0.9%                         | 6 0.9%                                           | 2 0.7%                                          | 4 2.5%                            | 4 0.2%                               |
| White                                                  | 653 96.6%                      | 642 98.0%                                        | 298 97.7%                                       | 149 93.1%                         | 1958 96.3%                           |
| Prefer not to say /no data                             | 3 0.4%                         | 1 0.2%                                           | 0 0.0%                                          | 2 1.3%                            | 19 0.9%                              |
| Mean BMI, SD                                           | 27.6 5.8                       | 27.6 5.0                                         | 26.2 4.2                                        | 31.2 6.1                          | 29.5 5.2                             |
| IMD decile, IQR (lower= more deprived)                 | 3 1-6                          | 4 2-7                                            | 5 2.7                                           | 4 1-6                             | 4 1-7                                |
| IMD rank, median, IQR (lower=more deprived)            | 8791 2995-18838                | 11667 3476-20875                                 | 15025 4286- 21414                               | 9864 2279-19515                   | 12497 3546-21237                     |
| <b>Education, n, %</b>                                 |                                |                                                  |                                                 |                                   |                                      |
| No qualifications, left school at or before 15         | 463 68.5%                      | 406 62.0%                                        | 174 57.0%                                       | 111 69.4%                         | 1170 57.6%                           |
| O-levels, CSEs or equivalent                           | 98 14.5%                       | 119 18.2%                                        | 58 19.0%                                        | 20 12.5%                          | 390 19.2%                            |
| A-levels or equivalent and above                       | 113 16.7%                      | 127 19.4%                                        | 72 23.6%                                        | 29 18.1%                          | 463 22.8%                            |
| Prefer not to say /no data                             | 2 0.3%                         | 3 0.5%                                           | 1 0.3%                                          | 0 0.0%                            | 10 0.5%                              |
| <b>Smoking status</b>                                  |                                |                                                  |                                                 |                                   |                                      |
| Current (within the last month), n, %                  | 259 38.3%                      | 319 48.7%                                        | 99 32.5%                                        | 50 31.3%                          | 583 28.7%                            |
| Former in last year, n, %                              | 33 4.9%                        | 10 1.5%                                          | 12 3.9%                                         | 3 1.9%                            | 59 2.9%                              |
| Former over a year, n, %                               | 384 56.8%                      | 326 49.8%                                        | 194 63.6%                                       | 107 66.9%                         | 1391 68.4%                           |
| Pack years, median, IQR                                | 38 28-50                       | 38 27-48                                         | 32 25-43                                        | 36 26-48                          | 34 25-42                             |

Table E2- Clinical information of individuals categorised according to General Practice COPD diagnostic code, airflow obstruction, and the presence of COPD symptoms. GP, General Practitioner. COPD, Chronic Obstructive Pulmonary Disease. AO, Airflow Obstruction. TB, Tuberculosis. CAT, COPD Assessment Test. mMRC, Modified Medical Research Council. WHO, World Health Organisation. VAS, Visual Analogue Score. SD, Standard Deviation

|                                      | Group 1<br>GP COPD code,<br>AO | Group 2<br>No GP COPD code,<br>AO, COPD symptoms | Group 3<br>No GP COPD code,<br>AO, Asymptomatic | Group 4<br>GP COPD code,<br>No AO | Group 5<br>No GP COPD code,<br>No AO |
|--------------------------------------|--------------------------------|--------------------------------------------------|-------------------------------------------------|-----------------------------------|--------------------------------------|
| Number participants                  | 676                            | 655                                              | 305                                             | 160                               | 2033                                 |
| <b>Self-reported diagnoses, n, %</b> |                                |                                                  |                                                 |                                   |                                      |
| None                                 | 24 3.6%                        | 447 68.2%                                        | 251 82.3%                                       | 15 9.4%                           | 1470 72.3%                           |
| COPD                                 | 632 93.5%                      | 28 4.3%                                          | 2 0.7%                                          | 134 83.8%                         | 40 2.0%                              |
| Emphysema                            | 75 11.1%                       | 7 1.1%                                           | 0 0.0%                                          | 15 9.4%                           | 8 0.4%                               |
| Bronchitis                           | 184 27.2%                      | 120 18.3%                                        | 29 9.5%                                         | 36 22.5%                          | 355 17.5%                            |
| Pneumonia                            | 151 22.3%                      | 88 13.4%                                         | 26 8.5%                                         | 41 25.6%                          | 245 12.1%                            |
| TB                                   | 13 1.9%                        | 10 1.5%                                          | 4 1.3%                                          | 0 0.0%                            | 22 1.1%                              |
| Asthma (* excluded )                 | 142 21.0%                      | 0*                                               | 0*                                              | 25 15.6%                          | 151 7.4%                             |
| <b>Symptoms, n, %</b>                |                                |                                                  |                                                 |                                   |                                      |
| None                                 | 56 8.3%                        | 0 0.0%                                           | 305 100.0%                                      | 11 6.9%                           | 699 34.4%                            |
| Wheeze                               | 354 52.4%                      | 252 38.5%                                        | 0 0.0%                                          | 85 53.1%                          | 474 23.3%                            |
| Bronchitis                           | 128 18.9%                      | 37 5.6%                                          | 0 0.0%                                          | 24 15.0%                          | 134 6.6%                             |
| Breathlessness                       | 527 78.0%                      | 477 72.8%                                        | 0 0.0%                                          | 126 78.8%                         | 982 48.3%                            |
| Cough                                | 262 38.8%                      | 247 37.7%                                        | 0 0.0%                                          | 60 37.5%                          | 401 19.7%                            |
| Sputum                               | 327 48.4%                      | 239 36.5%                                        | 0 0.0%                                          | 69 43.1%                          | 435 21.4%                            |
| Missing data                         | 4 0.6%                         | 6 0.9%                                           | 0 0.0%                                          | 2 1.3%                            | 14 0.7%                              |
| <b>COPD CAT score, n, %</b>          |                                |                                                  |                                                 |                                   |                                      |
| Low (<10)                            | 222 32.8%                      | 329 50.2%                                        | 281 92.1%                                       | 48 30.0%                          | 1357 66.7%                           |
| Medium (10-20)                       | 278 41.1%                      | 284 43.4%                                        | 24 7.9%                                         | 75 46.9%                          | 553 27.2%                            |
| High (>20)                           | 134 19.8%                      | 32 4.9%                                          | 0 0.0%                                          | 31 19.4%                          | 96 4.7%                              |
| Very high (>30)                      | 38 5.6%                        | 4 0.6%                                           | 0 0.0%                                          | 4 2.5%                            | 13 0.6%                              |
| Missing data                         | 4 0.6%                         | 6 0.9%                                           | 0 0.0%                                          | 2 1.3%                            | 14 0.7%                              |
| Median CAT score (IQR)               | 13 8-21                        | 9 6-14                                           | 4 2-6                                           | 15 9-20                           | 7 4-11                               |
| <b>mMRC dyspnoea score, n, %</b>     |                                |                                                  |                                                 |                                   |                                      |
| 0                                    | 128 18.9%                      | 250 38.2%                                        | 247 81.0%                                       | 22 13.8%                          | 1024 50.4%                           |
| 1                                    | 303 44.8%                      | 308 47.0%                                        | 53 17.4%                                        | 64 40.0%                          | 778 38.3%                            |
| 2                                    | 113 16.7%                      | 57 8.7%                                          | 3 1.0%                                          | 34 21.3%                          | 141 6.9%                             |
| 3                                    | 68 10.1%                       | 24 3.7%                                          | 1 0.3%                                          | 22 13.8%                          | 59 2.9%                              |
| 4                                    | 60 8.9%                        | 10 1.5%                                          | 1 0.3%                                          | 16 10.0%                          | 17 0.8%                              |
| Missing data                         | 4 0.6%                         | 6 0.9%                                           | 0 0.0%                                          | 2 1.3%                            | 14 0.7%                              |

|                                                                    |           |           |           |          |            |
|--------------------------------------------------------------------|-----------|-----------|-----------|----------|------------|
|                                                                    |           |           |           |          |            |
| <b>WHO performance status, n, %</b>                                |           |           |           |          |            |
| 0                                                                  | 284 42.0% | 430 65.6% | 265 86.9% | 54 33.8% | 1479 72.7% |
| 1                                                                  | 278 41.1% | 175 26.7% | 33 10.8%  | 67 41.9% | 421 20.7%  |
| 2                                                                  | 72 10.7%  | 33 5.0%   | 7 2.3%    | 25 15.6% | 80 3.9%    |
| 3                                                                  | 36 5.3%   | 9 1.4%    | 0 0.0%    | 11 6.9%  | 39 1.9%    |
| 4                                                                  | 2 0.3%    | 2 0.3%    | 0 0.0%    | 1 0.6%   | 0 0.0%     |
| Missing data                                                       | 4 0.6%    | 6 0.9%    | 0 0.0%    | 2 1.3%   | 14 0.7%    |
|                                                                    |           |           |           |          |            |
| Required antibiotics for chest from GP in last year, n, %          | 302 44.7% | 118 18.0% | 30 9.8%   | 60 37.5% | 276 13.6%  |
| Required admission to hospital because of chest in last year, n, % | 37 5.5%   | 11 1.7%   | 3 1.0%    | 11 6.9%  | 25 1.2%    |

Table E3 - Spirometry and CT findings of individuals categorised according to General Practice COPD diagnostic code, airflow obstruction, and the presence of COPD symptoms. GP, General Practitioner. COPD, Chronic Obstructive Pulmonary Disease. AO, Airflow Obstruction. SD, Standard Deviation. FEV1, Forced Expiratory Volume in 1 Second. FVC, Forced Vital Capacity. CT, Computed Tomography.

|                                            | Group 1<br>GP COPD code,<br>AO |       | Group 2<br>No GP COPD code,<br>AO, COPD symptoms |       | Group 3<br>No GP COPD code,<br>AO, Asymptomatic |       | Group 4<br>GP COPD code,<br>No AO |       | Group 5<br>No GP COPD code,<br>No AO |       |
|--------------------------------------------|--------------------------------|-------|--------------------------------------------------|-------|-------------------------------------------------|-------|-----------------------------------|-------|--------------------------------------|-------|
| Number of participants                     | 676                            |       | 655                                              |       | 305                                             |       | 160                               |       | 2033                                 |       |
| <b>Spirometry, mean, SD</b>                |                                |       |                                                  |       |                                                 |       |                                   |       |                                      |       |
| FEV1/FVC ratio                             | 56.7                           | 9.1   | 62.7                                             | 6.1   | 63.7                                            | 5.8   | 73.8                              | 3.4   | 75.3                                 | 3.8   |
| FEV1 (L)                                   | 1.61                           | 0.59  | 2.02                                             | 0.61  | 2.17                                            | 0.63  | 2.06                              | 0.65  | 2.48                                 | 0.65  |
| FEV1 %                                     | 69                             | 20    | 80                                               | 19    | 87                                              | 18    | 87                                | 18    | 99                                   | 17    |
| FVC (L)                                    | 2.81                           | 0.85  | 3.21                                             | 0.90  | 3.40                                            | 0.92  | 2.80                              | 0.89  | 3.29                                 | 0.86  |
| FVC %                                      | 94                             | 21    | 101                                              | 22    | 107                                             | 20    | 94                                | 21    | 105                                  | 19    |
| <b>Emphysema on CT, n, %</b>               |                                |       |                                                  |       |                                                 |       |                                   |       |                                      |       |
| Trivial (<5%)                              | 125                            | 18.5% | 189                                              | 28.9% | 108                                             | 35.4% | 50                                | 31.3% | 713                                  | 35.1% |
| Mild (5-25%)                               | 208                            | 30.8% | 187                                              | 28.5% | 83                                              | 27.2% | 47                                | 29.4% | 377                                  | 18.5% |
| Moderate (25-50%)                          | 139                            | 20.6% | 87                                               | 13.3% | 32                                              | 10.5% | 12                                | 7.5%  | 104                                  | 5.1%  |
| Severe (50-75%)                            | 78                             | 11.5% | 21                                               | 3.2%  | 7                                               | 2.3%  | 5                                 | 3.1%  | 10                                   | 0.5%  |
| Very severe (>75%)                         | 11                             | 1.6%  | 4                                                | 0.6%  | 1                                               | 0.3%  | 0                                 | 0.0%  | 0                                    | 0.0%  |
| Mild/Moderate/Severe/Very severe emphysema | 436                            | 64.5% | 299                                              | 45.6% | 123                                             | 40.3% | 64                                | 40.0% | 491                                  | 24.2% |
| Trivial/No emphysema                       | 207                            | 30.6% | 308                                              | 47.0% | 164                                             | 53.8% | 82                                | 51.3% | 1262                                 | 62.1% |
| Not reported / missing data/ unclear       | 33                             | 4.9%  | 48                                               | 7.3%  | 18                                              | 5.9%  | 14                                | 8.8%  | 280                                  | 13.8% |
| <b>Emphysema type, n, %</b>                |                                |       |                                                  |       |                                                 |       |                                   |       |                                      |       |
| Centrilobular                              | 427                            | 63.2% | 334                                              | 51.0% | 162                                             | 53.1% | 84                                | 52.5% | 783                                  | 38.5% |
| Panacinar                                  | 13                             | 1.9%  | 3                                                | 0.5%  | 2                                               | 0.7%  | 0                                 | 0.0%  | 4                                    | 0.2%  |
| Paraseptal                                 | 85                             | 12.6% | 97                                               | 14.8% | 41                                              | 13.4% | 17                                | 10.6% | 233                                  | 11.5% |
| Not reported / missing data/ no emphysema  | 151                            | 22.3% | 221                                              | 33.7% | 100                                             | 32.8% | 59                                | 36.9% | 1013                                 | 49.8% |
| <b>Emphysema distribution, n, %</b>        |                                |       |                                                  |       |                                                 |       |                                   |       |                                      |       |
| Diffuse                                    | 191                            | 28.3% | 117                                              | 17.9% | 76                                              | 24.9% | 40                                | 25.0% | 347                                  | 17.1% |
| Lower lobe                                 | 12                             | 1.8%  | 8                                                | 1.2%  | 5                                               | 1.6%  | 1                                 | 0.6%  | 27                                   | 1.3%  |
| Upper lobe                                 | 332                            | 49.1% | 217                                              | 33.1% | 126                                             | 41.3% | 57                                | 35.6% | 646                                  | 31.8% |
| Not reported / missing data                | 141                            | 20.9% | 313                                              | 47.8% | 98                                              | 32.1% | 62                                | 38.8% | 1013                                 | 49.8% |

Table E4 - Self-reported inhaler use amongst individuals categorised according to General Practice COPD diagnostic code, airflow obstruction, and the presence of COPD symptoms.

GP, General Practitioner. COPD, Chronic Obstructive Pulmonary Disease. AO, Airflow Obstruction. SABA, Short-acting beta-agonist. LABA, Long-acting beta agonist. LAMA, Long-acting muscarinic antagonist. ICS, Inhaled corticosteroid.

|                       | <b>Group 1<br/>GP COPD code, AO</b> |       | <b>Group 2<br/>No GP COPD code,<br/>AO, COPD symptoms</b> |      | <b>Group 3<br/>No GP COPD code,<br/>AO, Asymptomatic</b> |      | <b>Group 4<br/>GP COPD code,<br/>No AO</b> |       | <b>Group 5<br/>No GP COPD code,<br/>No AO</b> |       |
|-----------------------|-------------------------------------|-------|-----------------------------------------------------------|------|----------------------------------------------------------|------|--------------------------------------------|-------|-----------------------------------------------|-------|
| Total number in group | 676                                 |       | 655                                                       |      | 305                                                      |      | 160                                        |       | 2,033                                         |       |
| Any inhaler, n, %     | 608                                 | 89.9% | 57                                                        | 8.7% | 8                                                        | 2.6% | 136                                        | 85.0% | 216                                           | 10.6% |
| SABA, n, %            | 555                                 | 82.1% | 49                                                        | 7.5% | 8                                                        | 2.6% | 115                                        | 71.9% | 198                                           | 9.7%  |
| LABA, n, %            | 461                                 | 68.2% | 10                                                        | 1.5% | 1                                                        | 0.3% | 103                                        | 64.4% | 69                                            | 3.4%  |
| LAMA, n, %            | 373                                 | 55.2% | 6                                                         | 0.9% | 1                                                        | 0.3% | 77                                         | 48.1% | 17                                            | 0.8%  |
| ICS, n, %             | 295                                 | 43.6% | 19                                                        | 2.9% | 2                                                        | 0.7% | 73                                         | 45.6% | 99                                            | 4.9%  |
